1 **The effect of BMI and physical activity levels on the duration of symptomatic days with**  
2 **Covid-19 infection.**

3 Abdulazeem S Alataibi<sup>1</sup> and Boukhemis Boukelia<sup>2,3</sup>

4 <sup>1</sup>Al Qasseem University, Al Qaseem, P.O.Box 6688. KSA. <sup>2</sup>Hull University, Cottingham  
5 Road, Hull HU6 7RX. UK. <sup>3</sup> Britannia Sport and Exercise Science Academy. 6/7 Duff street  
6 lane Edinburgh. UK.

7  
8 **Abstract**

9 Regular exercise is known to boost immunity, increase immune response to fight infection, as  
10 well as speeding up recovery times and healing processes. This study seeks to assess if  
11 exercising regularly pre- SARS-CoV-2 (COVID-19) and/or BMI status has an effect on  
12 recovery time.

13 A total of 215 people infected with COVID-19 from the Kingdom of Saudi Arabia took part in  
14 this study (age 36±16 years, mass 72±15 kg, stature 166±11 cm). Only 10 patients were  
15 physically active and fulfil WHO physical activity requirement (Age 30±7 years, Mass 77±9  
16 kg, Stature 176±1 cm).

17 There was a significant difference in recovery time between active and inactive patients  
18 (P=0.00) with active patients' recovery 2.7 times faster than inactive patients. Active patients  
19 showed a lower BMI level (p=0.043).

20 Anthropometric measurement characteristics and the fitness level could be used in decision  
21 making scenarios for the estimation of the risk of complications in patients with COVID-19.

22 **Novelty:**

- 23 • Covid-19 physical active patients shows faster recovery time.  
24 • Active patients recorded a BMI of over 25kg/m<sup>2</sup>, recovered faster than those inactive  
25 patients with similar BMI's.

26  
27 **Key words:** COVID-19, Physical activity, Physical inactivity, BMI, Recovery, KSA.  
NOT: This preprint reports new research that has not been certified by peer review and should not be used to guide clinical practice.

## 28 **Introduction**

29 The rapid spread of the corona virus that causes COVID-19 (SARS-CoV-2) has sparked alarm  
30 worldwide. The way the virus spreads is still debated; however, it is known that similar viruses  
31 are spread in cough and sneeze droplets and possibly in aerosols. At the time of writing this  
32 manuscript over eleven million people worldwide have been infected with over five hundred  
33 thousand deaths (WHO, 2020). Symptoms of COVID-19 are often mild and begin gradually,  
34 and include fever, fatigue, dry cough, some pain and aches, nasal congestion, cold, sore throat,  
35 and diarrhea (Zheng et al., 2020), whereas some people become infected without showing any  
36 symptoms at all. The prevalence of developing COVID-19 symptoms among populations with  
37 chronic disease are high (Pablos et al., 2020). In Garg et al. (2020), among patients aged 18–  
38 49 years, obesity was the most prevalent underlying condition, followed by asthma and diabetes  
39 mellitus. In patients over 50 years, obesity was most prevalent, followed by hypertension. It  
40 has also been reported that COVID-19 is more likely to occur in older and adults' people within  
41 weaker immune functions (Chen et al., 2020).

42  
43 It is well documented that physical activity stimulates the human immune system and  
44 strengthens the infection defence system (Simpson et al., 2006). Moreover, evidence suggests  
45 that sedentary people who become physically active get a progressively stronger immune  
46 system and become less susceptible to infections (Nash, 1994). Hence, many studies support  
47 the concept that engaging in regular bouts of moderate aerobic exercise protect against  
48 respiratory infections (Nieman et al., 1993; Nieman et al., 2011; Boukelia et al., 2016). For  
49 example, the risk of upper respiratory tract infection reduced by up to 67% compared to  
50 sedentary population (Gleeson, 2007) Outstandingly, 20–40 minutes of moderate daily  
51 exercise was reported to be adequate to promote a beneficial effect on the immune system. This  
52 exercise-induced protection against infection can be achieved with many types of aerobic

53 activity such as running, swimming, walking, and dancing (Nieman et al., 2011). The  
54 mechanism behind the moderate exercise protection against respiratory infection remain  
55 debated. Nonetheless, there are several possible reasons to explain this, such as, an increase in  
56 natural killer cells, neutrophils, and antibodies in the blood stream (Miles et al., 2002). For each  
57 bout of exercise, the human body mobilizes billions of immune cells types that are capable of  
58 recognising and killing virus-infected cells. In addition, exercise also releases muscle-derived  
59 cytokines which help to maintain immunity such as IL-6, IL-7, and IL-15. IL-6 has been shown  
60 to mobilise immune cell to the infected area, while IL-7 helps to maintain the peripheral T-cell  
61 and NK-cell compartments which assist to increase the human body resistance to infection  
62 (Simpson, 2020). Furthermore, improved psychological well-being could be another possible  
63 factor (emotional stress control).

64

65 The Kingdom of Saudi Arabia has been reporting an average of 11.1 cases per 100,000 people  
66 with a mortality rate of 0.91% (MOH 2020). WHO ranks the outbreak of COVID-19 at the  
67 orange risk level (the second highest risk category) which means it is quickly spreading (WHO,  
68 2020). A preventative measure for reducing the likelihood of this or future infections may be  
69 found through increased activity and reduced obesity within the population.

70 Three quarters of the adult population are classified as inactive in KSA (Al-Hazzaa, et al.,  
71 2011), following similar trends of developed countries across the world. Nevertheless, this  
72 sedentary lifestyle has been associated with a greater risk of early mortality from obesity related  
73 diseases that equate to 6% of the total death rate globally each year (Henriksen et al., 2019).  
74 This study aims to investigate the effect of fitness level on the rate of recovery time among  
75 positive COVID-19 tested in KSA.

76

## 77 **Methodology**

78 A questionnaire developed by the Health and Exercise Science Department at al Qassim  
79 University, KSA were used in this study. A 12 multiple choice questionnaire using a self-rated  
80 scale was used to evaluate the effect of fitness level on the recovery time in SARS-CoV-2  
81 (COVID-19) patients. 215 (mean age  $\pm$  36.3 $\pm$ 16.2) COVID-19 infected participants from the  
82 region of Riyadh, KSA took part in this study. All infected patients observed self-isolation  
83 within medically monitored hotels and kept away from their families to minimize the risk of  
84 spreading the virus. All patients were under direct supervision of a medical team and received  
85 daily assessment on their state of health, patients that tested negative for the virus were allowed  
86 to return home. The participants were divided into two groups, a sedentary group and an active  
87 group that fulfills WHO activity criteria (no less than 150 minutes of physical activity a week).  
88 Analysis of the data revealed that from a total of 215 patients only 10 patients exercise routinely  
89 pre-positive test and fulfill the activity recommendation by WHO (150 mins a week). Body  
90 mass, age, ethnicity, diet, and sleep level were recorded as well.

91 All participants provided fully informed written consent before engaging with the experiment.  
92 This study was approved by the Al Qassim University Ethics Committee and was conducted  
93 in accordance with the guidelines of the 1964 Declaration of Helsinki and its later amendments  
94 or comparable ethical standards.

95 **Statistical Analysis:** Prior to statistical analysis, all data were checked for normality. Repeated  
96 measure T tests were used to determine significance difference in Active and Inactive patients  
97 and BMI in both groups (SPSS20 Statistical Software, IBM.UK). Statistical significance was  
98 accepted at  $P < 0.05$ . Results are represented as mean values  $\pm$  standard deviation (SD).  
99 Cohen's d was used to assess the size of the difference between two related sample.

## 100 Results

101 Table 1: Anthropometric measurements

102 Table 2: The average sleeping hours pre and during the quarantine period.

103

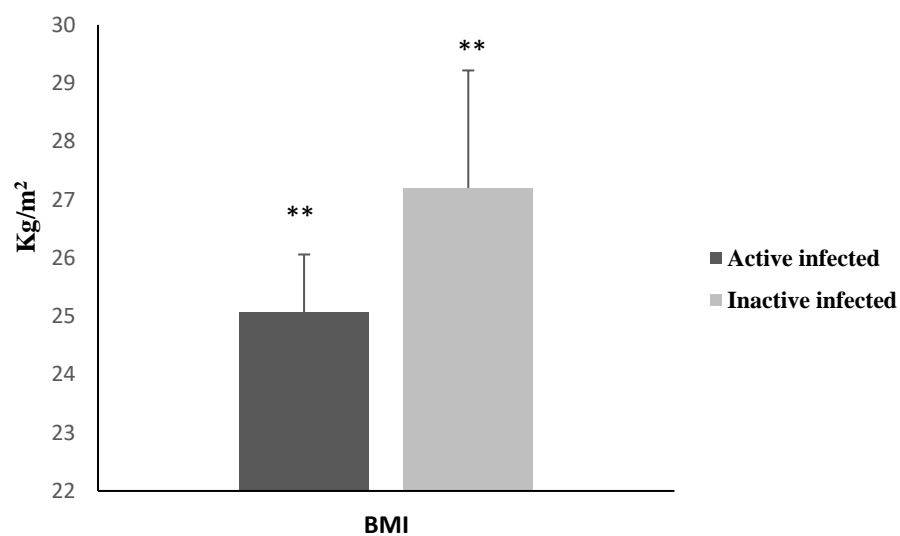

104

105 Graph 1: Active vs inactive tested Covid-19 positive BMI. \*\* denotes a significant different  
106 between active and inactive patients BMI ( $P < 0.05$ ), values are mean  $\pm$  SD.

107

108 There was a significant BMI difference between active and inactive patients  $t(19) = 2.15$ ,

109  $p=0.043$  (graph 1).

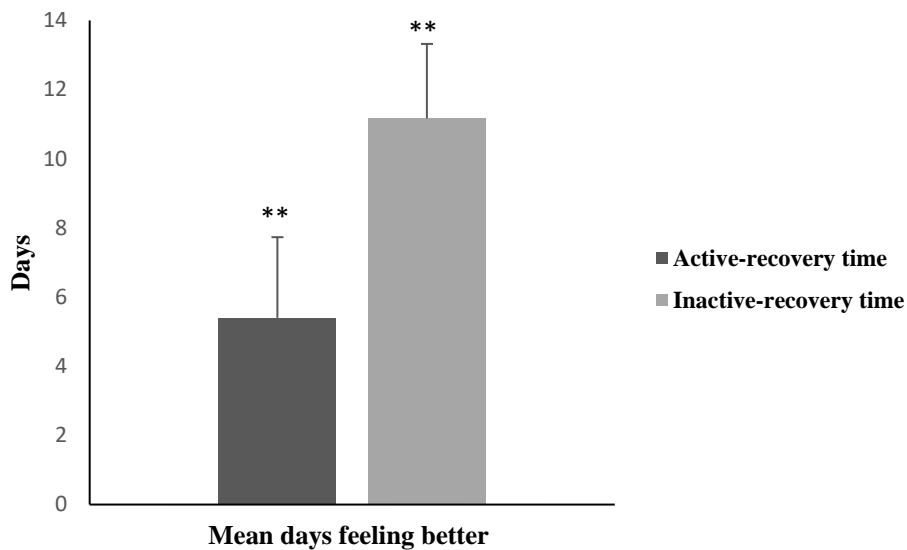

110

111 Graph 2: the mean days of feeling better active vs inactive infected patients. \*\*denotes a  
112 significant different between active and inactive patients in the time of feeling better ( $P < 0.05$ ),  
113 values are mean  $\pm$  SD

114 Inactive patients shows a significant slower recovery time compared to active patients  $t(19) =$   
115 3.29,  $p=0.004$  (graph 2). Active patients were recovered 2.7 times faster from COVID-19  
116 infection than the group of inactive infected patients.

117

118

119

120

121

122

123

124

125

126

127

128

129

130

131

132

## 133 **Discussion**

134 To date this is the first study to assess the effect that the level of physical activity and recovery  
135 period on COVID-19 infected patients. Therefore, this study provides evidence-based insights  
136 on the relationship between inactivity, higher BMI, and COVID-19 recovery time. Only 4% of  
137 the patients in this study were physically active in either amateur sport or recreational physical  
138 exercise that fulfil the WHO recommended level of activity requirement. A significant  
139 difference in BMI between active and inactive patients were evident in this study and has been  
140 shown to have a significant difference on the duration of recovery. the recovery period for the  
141 inactive population was slower by 207% compared to active patients. The outcome of this study  
142 supports the finding that individuals with higher BMI are more likely to have respiratory  
143 symptoms than individuals with a normal BMI (Gibson, 2000; El-Gamal et al., 2005; Babb et  
144 al., 2008). In a new report revealed by PHE, (2020) patients with over 25kg/m<sup>2</sup> of BMI  
145 (clinically overweight) are more than three times more likely to die of COVID-19 and seven  
146 times more likely to need a ventilator. In Stefan et al. (2020) 85% of patients with higher BMI  
147 required mechanical ventilation and 62% of the patients with higher BMI died of COVID-19,  
148 compared with 36% of those with a healthy weight.

149

150 Despite meeting the WHO recommended activity levels 4 out of 8 active patients in this study  
151 recorded a BMI of over 25kg/m<sup>2</sup> BMI of over 25kg/m<sup>2</sup>, nevertheless, they likewise recovered  
152 faster than those inactive patients with similar BMI's (an average of 3.75 days vs 10 days).  
153 Therefore, it has reported that increasing physical activity including those currently  
154 overweight, can reduce the risk of cardiovascular disease and improve health by being  
155 physically active (Koolhaas et al., 2017). The average participant age from this study of 215  
156 was 36±16 years old. Therefore, this study would support the findings of Kass et al. (2020) that  
157 found a significant inverse correlation between age and BMI, in which younger individuals that

158 are overweight are least severely affected by COVID-19 (Kass et al., 2020). Saudi Arabia has  
159 a rising obesity problem with approximately 40% of the total population categorised as obese  
160 (Alqarni, 2016). Therefore, this phenomenon may contribute to the fast spread and increased  
161 symptom severity and/or duration of COVID-19; that would consequently greatly stress the  
162 national health service.

163  
164 It must be considered that the low proportion of physically active patients recorded in this study  
165 may in fact be linked to asymptomatic infections that have remained undetected in the general  
166 population. Therefore, measurement of anthropometric characteristics and the level of activity  
167 could be key to estimating the risk of complications in patients with COVID-19. In addition,  
168 countries with high overweight or obese populations should adequately characterise the risk  
169 obesity poses in relation to COVID-19 symptoms alongside other contributing factors or  
170 chronic illnesses; particularly when considering future vaccination programs on the basis of  
171 risk. Individuals carrying excess weight will have poor responsiveness to vaccination against  
172 COVID-19 due to the impaired activation and function of t cells adaptive immune cells (Green  
173 and Beck, 2017), however, the development of novel immunization strategies for this  
174 population is warranted.

175

## 176 **Conflicts of Interest**

177 The authors of this publication were support and sponsored by Qassim University. The authors  
178 were wholly responsible for the research conducted in this paper and present the work without  
179 conflict of interest.

180

181



182 **Reference**

183

184 Alqarni, S.S.M. 2016. A Review of Prevalence of Obesity in Saudi Arabia. *Obesity & Eating*  
185 *Disorders.* 2. 2:25.

186

187 Babb, T.G, Ranasinghe, K.G, Comeau, L.A, Semon, T.L and Schwartz, B. 2008. Dyspnoea on  
188 exertion in obese women. *Am J Respir Crit Care Med.* 178:116–123.

189

190 Chen, N., Zhou, M., Dong,X., et al. 2020. Epidemiological and clinical characteristics of 99  
191 cases of 2019 novel coronavirus pneumonia in Wuhan, China: a descriptive study[J]  
192 *Lancet.* 395; 507-m13.

193

194 El-Gamal, H, Khayat, A, Shikora, S and Unterborn, J.N. 2005. Relationship of dyspnoea to  
195 respiratory drive and pulmonary function tests in obese patients before and after weight loss.  
196 *Chest.* 128:3870–3874.

197

198 Garg, S., Kim, L., Whitaker, M., et al. 2020. Hospitalization Rates and Characteristics of  
199 Patients Hospitalized with Laboratory-Confirmed Coronavirus Disease 2019 — COVID-NET,  
200 14 States. *MMWR Morb Mortal Wkly Rep.* 69:458–464.

201

202 Gibson, G.J. 2000. Obesity, respiratory function and breathlessness. *Thorax.* 55: S41–S44.

203

204 Gleeson, M. Immune function in sport and exercise. 2007. *J Appl Physiol.* 103: 693–699.

205

206 Green, W.D and Beck, M.B. 2017. Obesity Impairs the Adaptive Immune Response to  
207 Influenza Virus. *Ann Am Thorac Soc.* 14(5): S406–S409.

208 Miles, M.P., Kraemer, W.J, Grove, D.S, Leach, S.K, Dohi, K, Bush, J.A, Marx, J.O, Nindl,  
209 B.C., Volek, J.S and Mastro, A.M . 2002. Effects of resistance training on resting immune  
210 parameters in women. *European Journal of Applied Physiology*. 87: 506–508.

211

212 Ministry of health. 2020. COVID-19 cases with the mortality rate.

213 <https://www.moh.gov.sa/en/Pages/Default.aspx>

214

215 Nash, M.S. 1994. Exercise and immunology. *Medicine and Science in Sports and Exercise*.  
216 26(2):125-7.

217

218 Nieman, D.C, Henson,D.A., Austin, M.D and Sha, W. 2011. Upper respiratory tract infection  
219 is reduced in physically fit and active adults. *British Journal of Sports Medicine*. 45(12):987-  
220 92.

221

222 Nieman, D.C., Henson, D.A, Gusewitch, G., Warren, B.J, Dotson, R.C, Butterworth, D.E and  
223 Nehlsen-Cannarella, S.L. 1993. Physical activity and immune function in elderly women.  
224 *Medicine and Science in Sports and Exercise*. 25: 823–831, 1993.

225

226 Pablos, J, L., Abasolo, L., Alvaro-Gracia, J.M, *et al.* 2020. Prevalence of hospital PCR-  
227 confirmed COVID-19 cases in patients with chronic inflammatory and autoimmune rheumatic  
228 diseases. *Annals of the Rheumatic Diseases*. 10.1136- 217763.

229

230 Public health England (2020). publications gateway number: GW-1405.

231

- 232 Kass, D.A, Duggal,,P and Cingolani, O. 2020. Obesity could shift severe COVID-19 disease to  
233 younger ages. *The lancet*. 395, 10236, 1544-1545.  
234
- 235 Koolhaas, C.M., Dhana, K, Schoufour., J.D., Ikram,,M..A., Kavousi, M and Franco,,O..H.  
236 2017. Impact of physical activity on the association of overweight and obesity with  
237 cardiovascular disease: The Rotterdam Stud. *European Journal of Preventive Cardiology*.  
238 24(9) 933–940.  
239
- 240 Simpson, R.J. 2020. Exercise, Immunity and the COVID-19 Pandemic. *American college of*  
241 *sport sceince*.3  
242
- 243 Simpson, R. J., Florida-James, G. D., Whyte, G. P. and Guy, K. 2006. The effects of intensive,  
244 moderate and downhill treadmill running on human blood lymphocytes expressing the  
245 adhesion/activation molecules CD54 (ICAM-1), CD18 (beta (2) integrin) and CD53',  
246 *European Journal of Applied Physiology*. 97(1), 109-121.  
247
- 248 Stefan, N., Birkenfeld, A.L., Schulze, M.B. *et al*. 2020. Obesity and impaired metabolic  
249 health in patients with COVID-19. *Nat Rev Endocrinol* **16**, 341–342.  
250
- 251 Zheng, Y., Ma, Y., Zhang, J. *et al*. 2020. COVID-19 and the cardiovascular system. *Nat Rev*  
252 *Cardiol* **17**, 259–260.  
253  
254  
255  
256  
257

258 **Tables:**

259 The mean age, stature and mass were presented in table 1. Active patients showed 4 years  
260 younger than inactive patients. In addition, this data shows a correlation between age and  
261 physical activity.

262 Table 1: Anthropometric measurements

| Measurements | Physically Active | Physically inactive |
|--------------|-------------------|---------------------|
| Age (years)  | 30±7              | 34±6                |
| Stature (cm) | 176±0.1           | 170±0.06t           |
| Mass (kg)    | 77.8±9.75         | 78.8±7.6            |

263  
264 Active patients showed better sleeping hours compared to inactive patients at pre the quarantine  
265 period (Table2). Whereas, during the quarantine period 19.4% of active patients sleep less than  
266 5 hours compared to 9.7% at pre-quarantine period.

267

268 Table 2: The average sleeping hours pre and during the quarantine period.

| Sleeping hrs | Active (%)     |                   |      | Inactive (%)   |                   |      |
|--------------|----------------|-------------------|------|----------------|-------------------|------|
|              | Pre-quarantine | During quarantine | Δ    | Pre-quarantine | During quarantine | Δ    |
| >5 hrs       | 9.7            | 19.4              | -9.7 | 14             | 15.4              | -1.4 |
| 5-7 hrs      | 19.4           | 18.1              | +1.3 | 16.8           | 21                | -4.2 |
| <7 hrs       | 70.8           | 62.5              | +8.3 | 69.2           | 63.6              | +5.6 |

269

270

271

272

273 Figures:

274

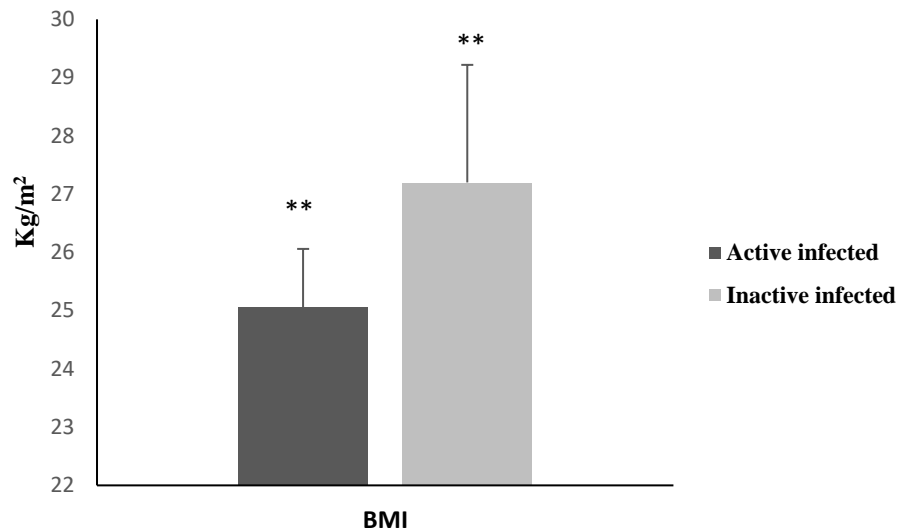

275

276 Graph 1: Active vs inactive tested Covid-19 positive BMI. \*\* denotes a significant different  
277 between active and inactive patients BMI ( $P < 0.05$ ), values are mean  $\pm$  SD.

278

279 There was a significant difference between active and inactive patients BMI  $t(19) = 2.15$ ,  
280  $p=0.043$  (graph 1).

281



282

283 Graph 2: the mean days of feeling better active vs inactive infected patients. \*\*denotes a  
284 significant different between active and inactive patients in the time of feeling better ( $P < 0.05$ ),  
285 values are mean  $\pm$  SD

286 Inactive patients shows a significant slower recovery time compared to active patients  $t(19) =$   
287 3.29,  $p=0.004$  (graph 2). Active patients were recovered 2.7 times faster from COVID-19  
288 infection than the group of inactive infected patients.

289

290
